# Supplementary material for: Prevention of the foreign body response to implantable medical devices by inflammasome inhibition
Source: PubMed Central journal article supplement (PMC8944905; doi:10.1073/pnas.2115857119), 2022-03-17
Supplement: pnas.2115857119.sapp.pdf [file pnas.2115857119.sapp.pdf]

Inflammasome GO Terms

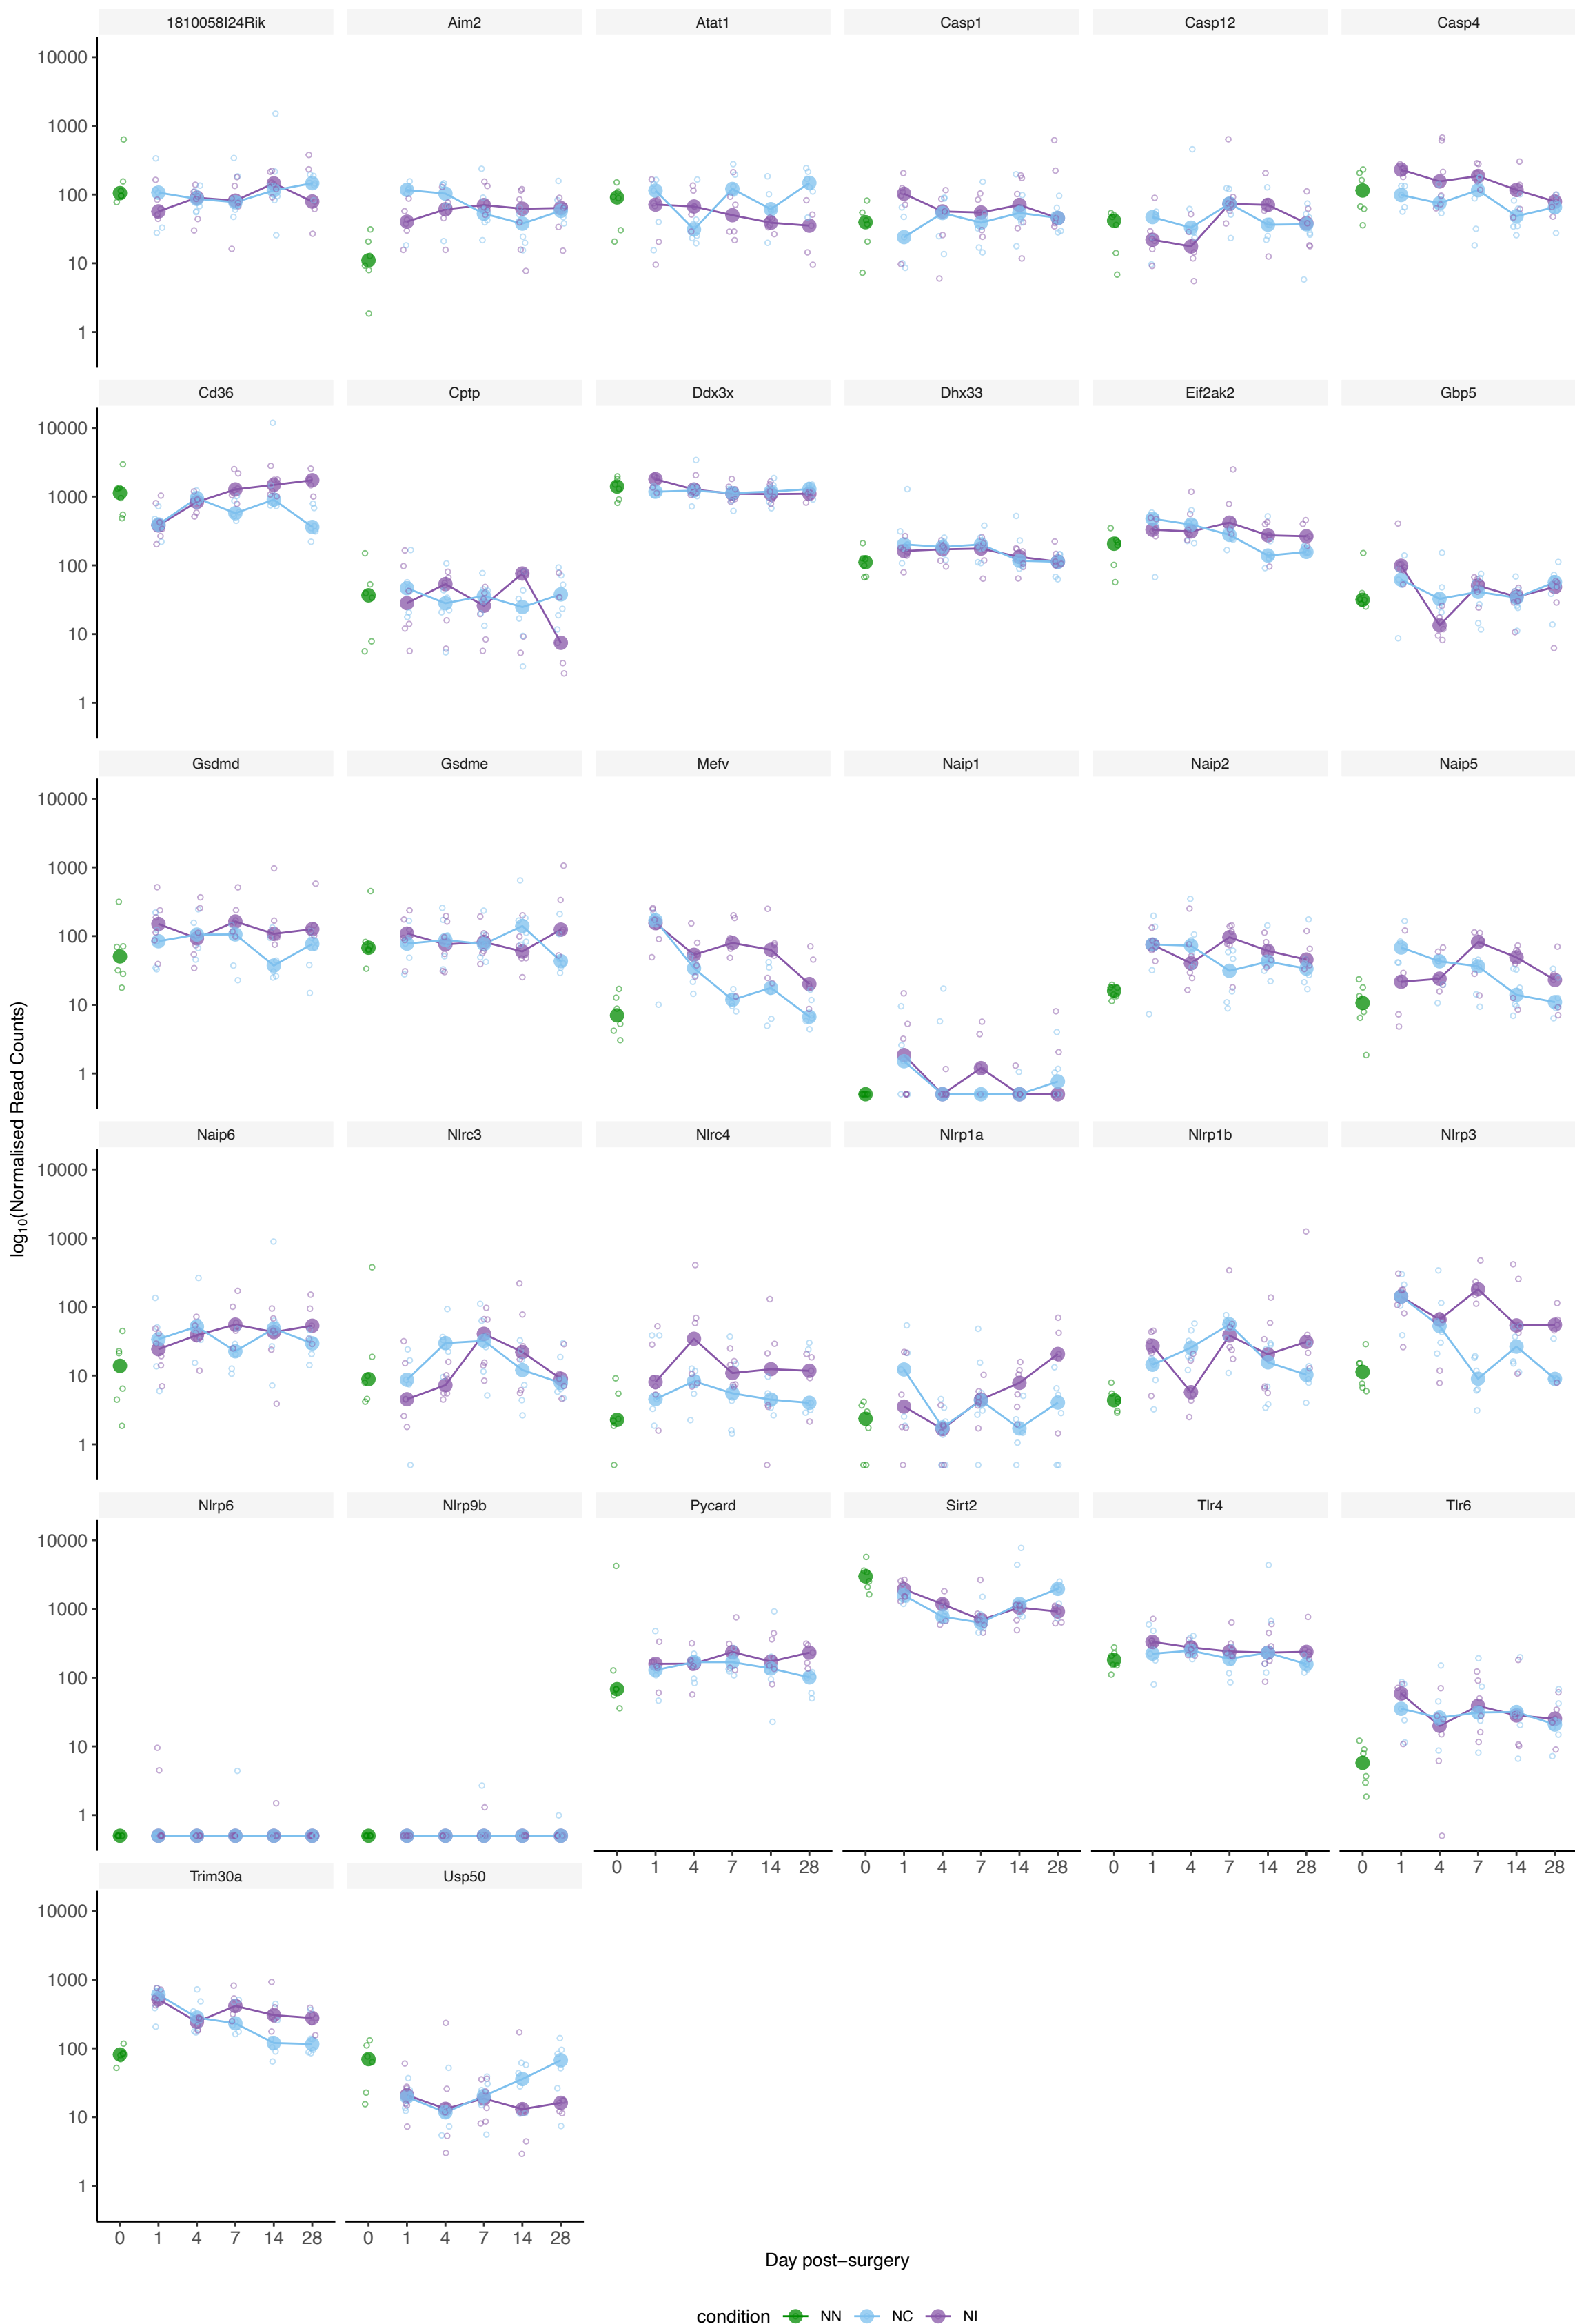

**Supplementary Figure 1. Bubbleplot of expression values of all genes in the the inflammasome complex gene ontology term (GO:0061702), as well as Gasdermin E (Gsdme).** Obtained through RNA sequencing of mice which had undergone microchannel cuff implantation (NI), crush nerve injury (NC), or naïve nerves (NN), at various days post-surgery. A subset of these plots are shown in Fig. 2e. Their combined expression is shown under inflammasome complex gene ontology (Fig. 1e, Fig. 2b).

## Cytotoxic Assay (MCC950)

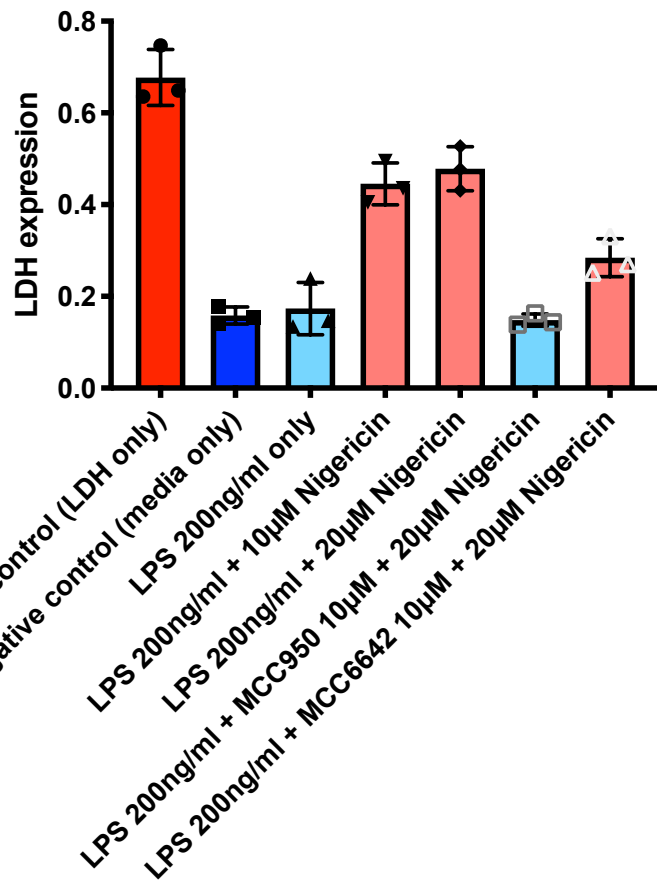

## *In vitro* IL1b production (MCC950)

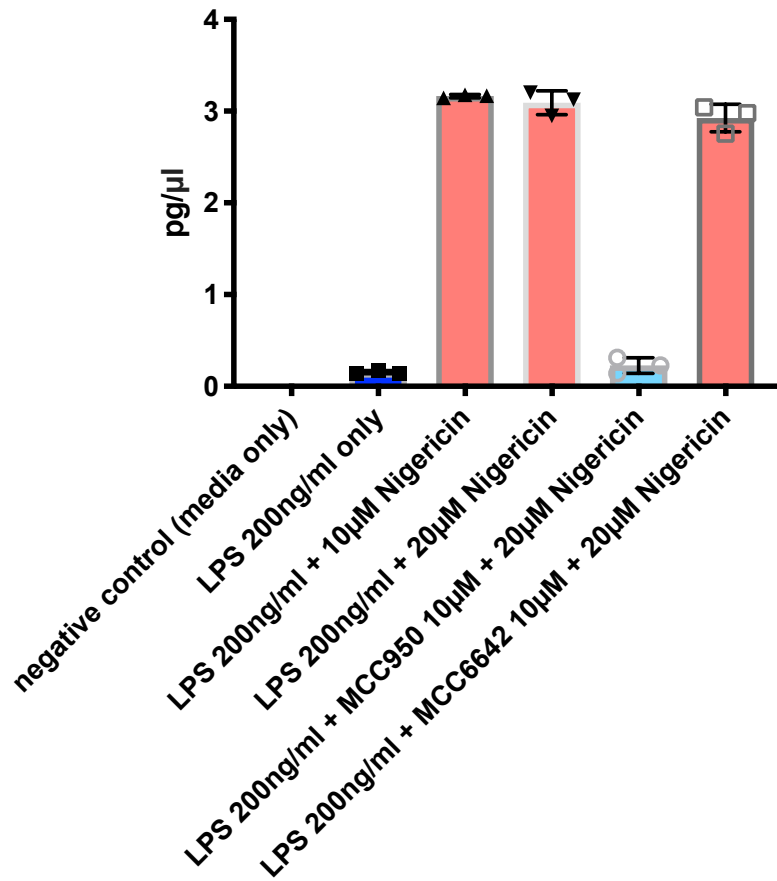

**Supplementary Figure 2. Validation of MCC950 inhibiting NLRP3.** MCC950 inhibits the production of the inflammasome product IL-1b *in vitro* (right), analyzed by ELISA. The inactive form MCC6642 used as a control does not affect its production. MCC950 does not produce any cytotoxicity *in vitro* (left), as characterized by LDH expression in a cytotoxic assay. Bar indicates sample mean, with bars indicating standard deviation. *In vitro* replicates represented as data points.

## Nerve implantation

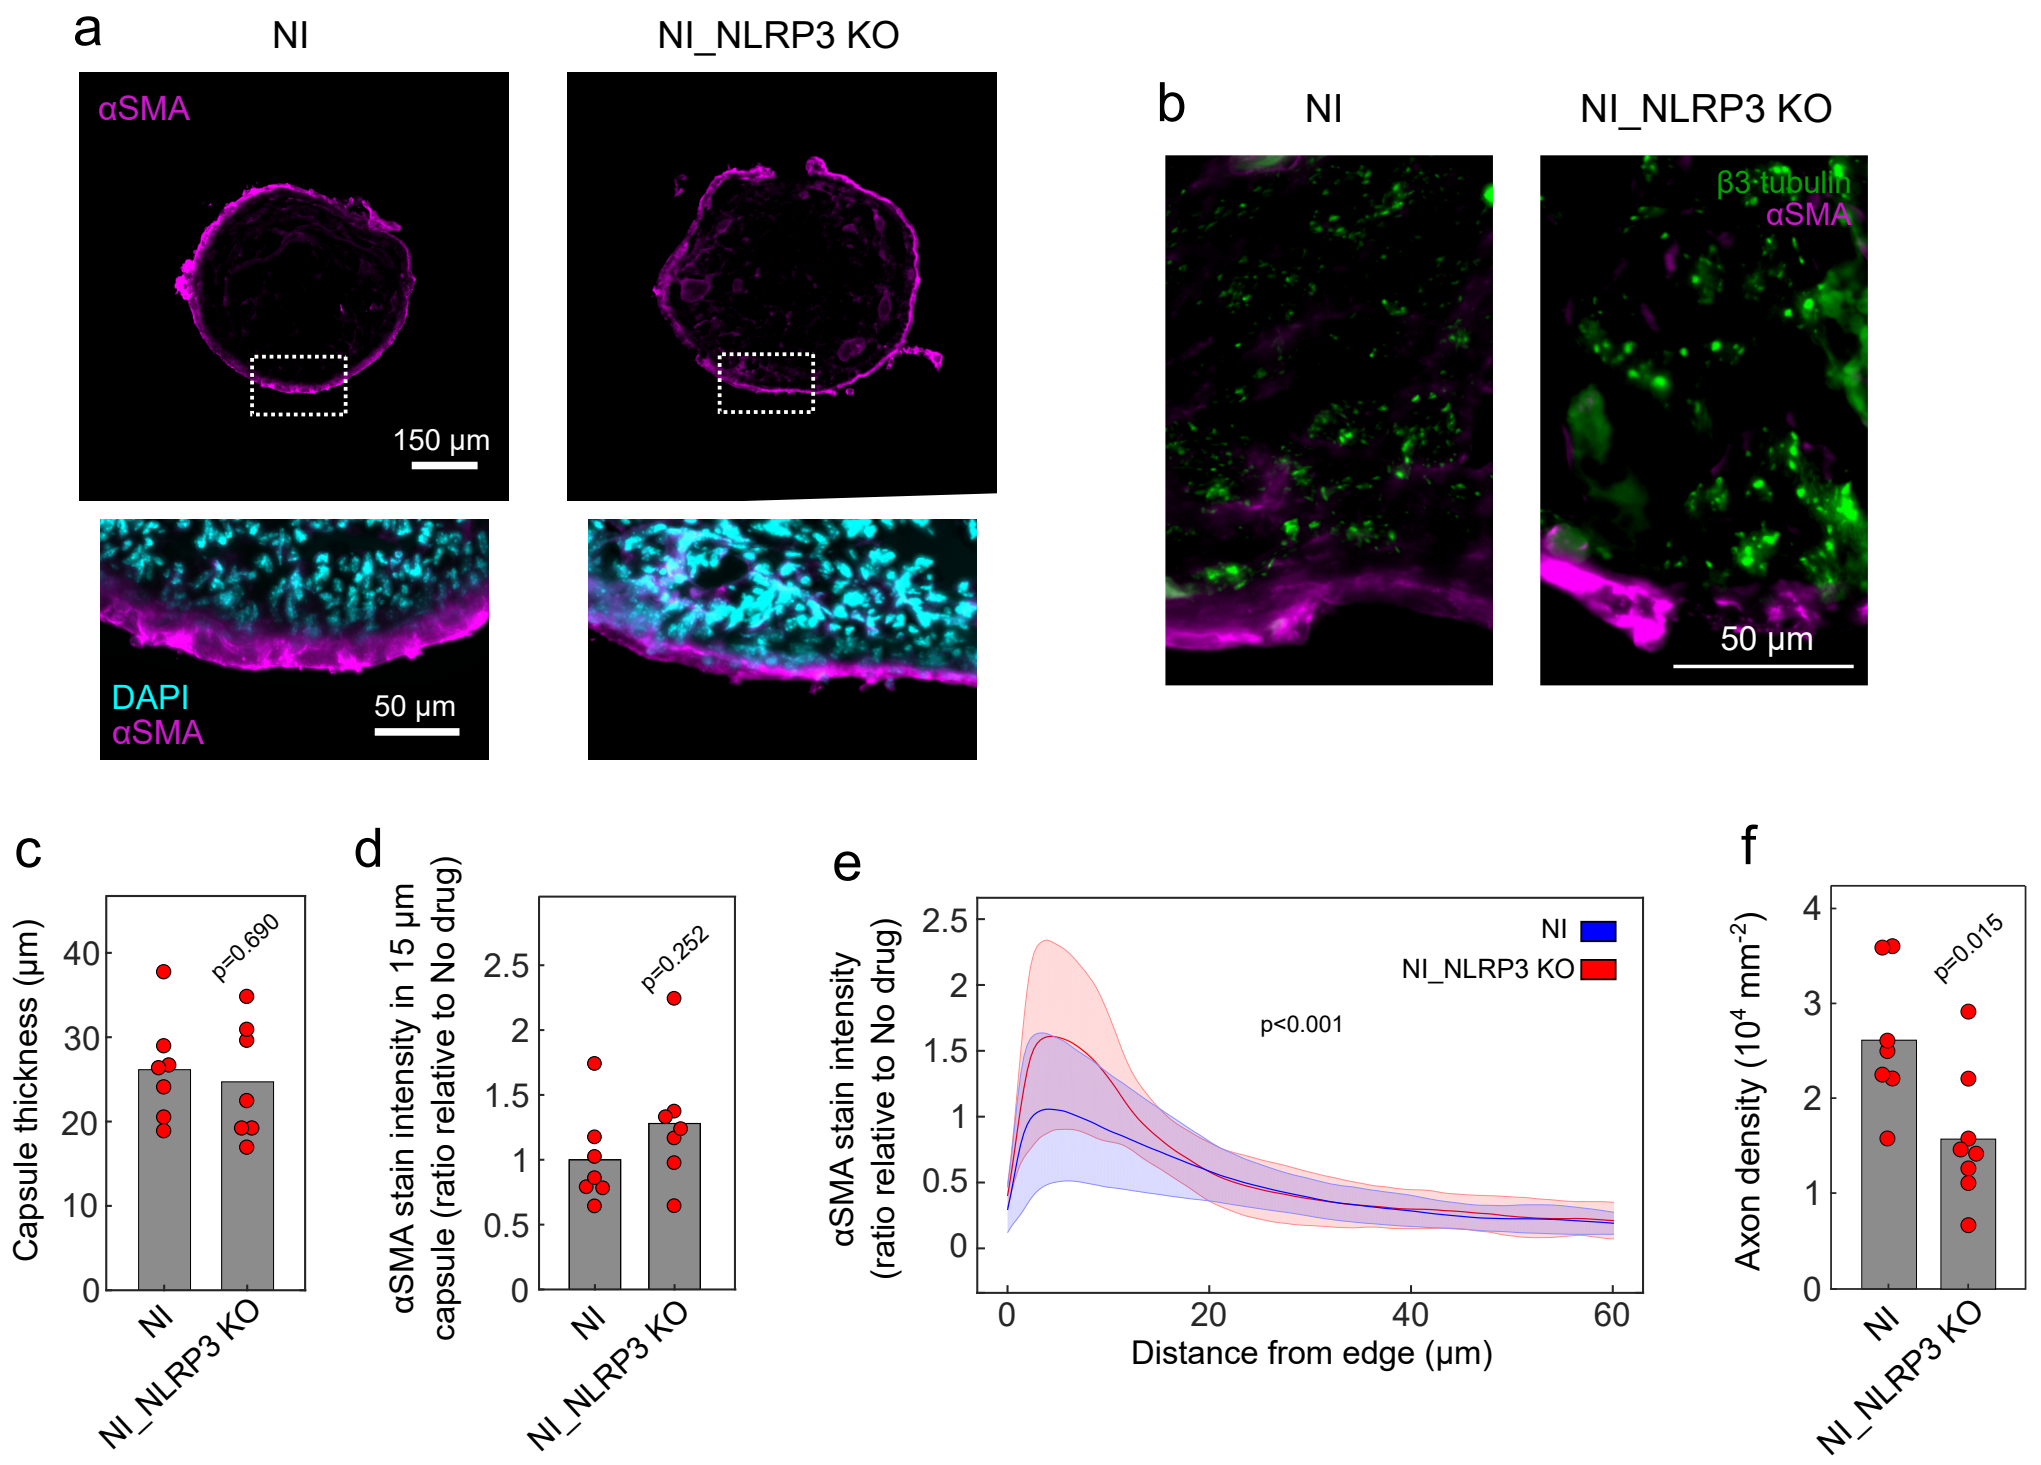

## Subcutaneous implantation

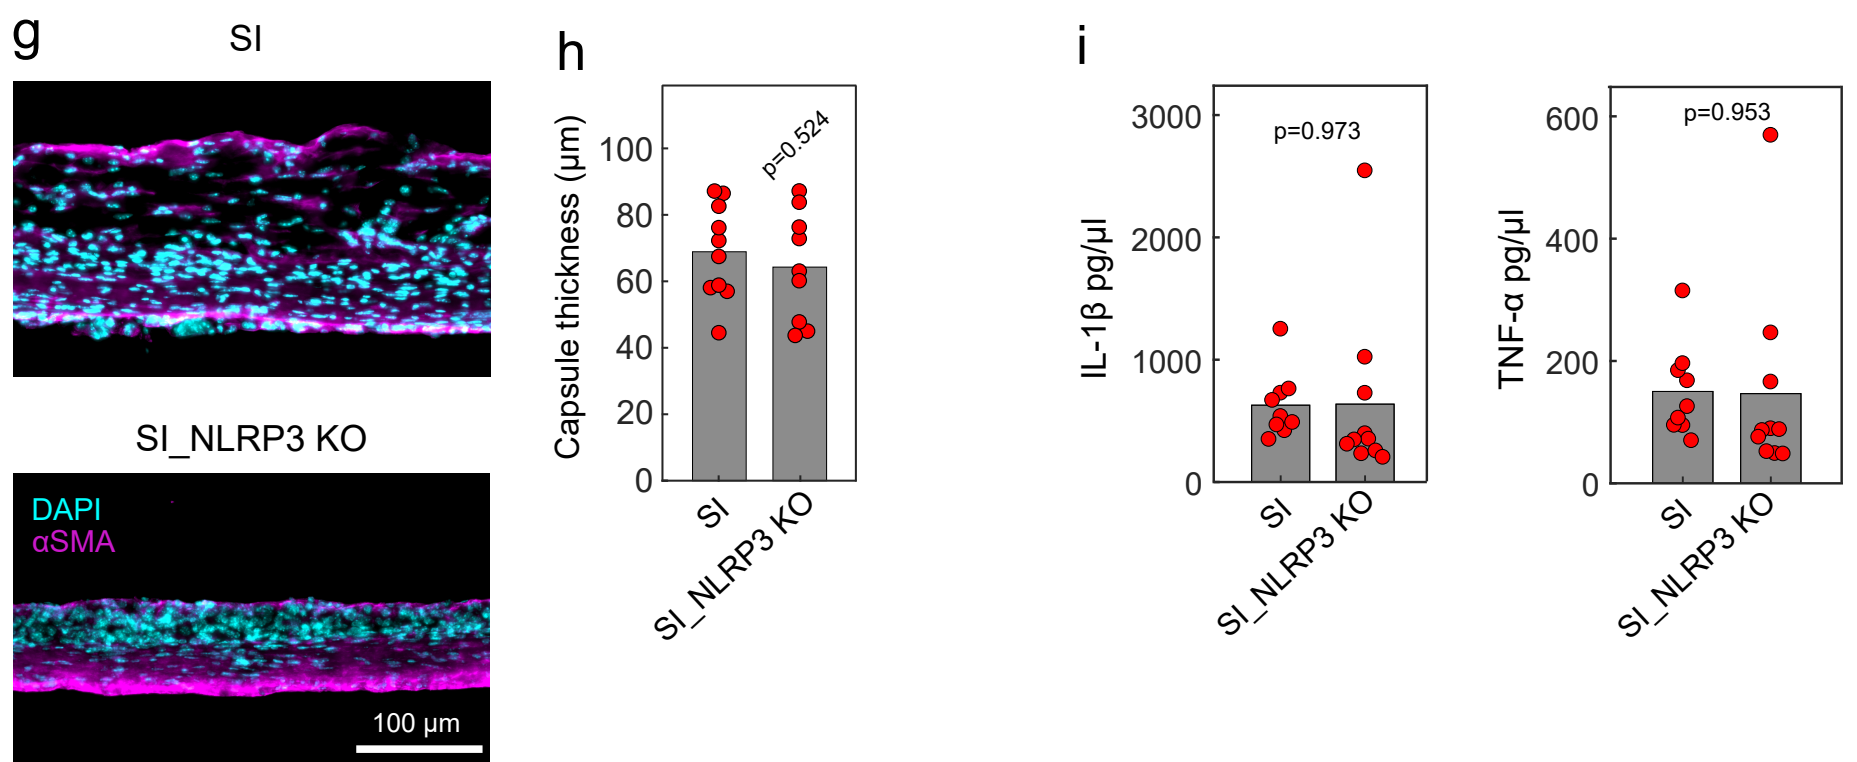

**Supplementary Figure 3. NLRP3 knockout mice develop normal levels of FBR.**

**a-b**, Z-stack confocal images (cross-sections) of FBR in nerve 3 months post-implantation of PDMS conduit. Conduits were implanted into wild type (NI) or into NLRP3<sup>-/-</sup> (NI\_NLRP3 KO) mice. The tissue was fluorescently labelled for the myofibroblast marker  $\alpha$ SMA (magenta), as well as cell nuclei (DAPI, cyan) in the insets (a); or for axon marker  $\beta$ 3 tubulin (green) and  $\alpha$ SMA (b). Inset highlighted by white dashed box. FBR to the conduit is characterized by a ring of myofibroblasts around the edge of the nerve **c**, Quantification of FBR capsule thickness around nerves, based on  $\alpha$ SMA stain. **d-e**, Quantification of FBR marker  $\alpha$ SMA stain intensity. Plot in **c** consists of average intensity over the 15  $\mu$ m closest to the implant edge. **f**, Quantification of axon density ( $\beta$ 3 tubulin stain pattern) in implanted nerves. **g**, Images of FBR capsules formed around subcutaneously implanted PDMS disks (SI), 3 months post-implantation, fluorescently stained for myofibroblasts ( $\alpha$ SMA, magenta) and cell nuclei (DAPI, cyan). **i**, ELISA of protein content in subcutaneous disk implants. For plots **c-d**, **f**, **h**, and **i**: circles indicate average value per mouse, and grey bar the average of all animals. Statistical comparisons carried out via Student's t-test. For plot **e**: solid lines correspond to average intensity for N = 7 mice at an increasing distance from implant edge, and the shaded envelope corresponds to the standard deviation. Statistical comparison done through two-way ANOVA.

| <b>Resource</b>       | <b>URL</b>                                                                                                                                  |
|-----------------------|---------------------------------------------------------------------------------------------------------------------------------------------|
| GRCm38                | <a href="http://mar2016.archive.ensembl.org/index.html">http://mar2016.archive.ensembl.org/index.html</a>                                   |
| FastQC                | <a href="http://www.bioinformatics.babraham.ac.uk/projects/fastqc/">http://www.bioinformatics.babraham.ac.uk/projects/fastqc/</a>           |
| Trim_galore           | <a href="http://www.bioinformatics.babraham.ac.uk/projects/trim_galore/">http://www.bioinformatics.babraham.ac.uk/projects/trim_galore/</a> |
| STAR                  | <a href="http://dx.doi.org/10.1093/bioinformatics/bts635">http://dx.doi.org/10.1093/bioinformatics/bts635</a>                               |
| HTSeq-counts          | <a href="http://dx.doi.org/10.1093/bioinformatics/btu638">http://dx.doi.org/10.1093/bioinformatics/btu638</a>                               |
| Feature_counts        | <a href="http://dx.doi.org/10.1093/bioinformatics/btt656">http://dx.doi.org/10.1093/bioinformatics/btt656</a>                               |
| Qualimap              | <a href="http://dx.doi.org/10.1093/bioinformatics/bts503">http://dx.doi.org/10.1093/bioinformatics/bts503</a>                               |
| ClusterFlow           | <a href="http://dx.doi.org/10.12688/f1000research.10335.2">http://dx.doi.org/10.12688/f1000research.10335.2</a>                             |
| MultiQC               | <a href="http://dx.doi.org/10.1093/bioinformatics/btw354">http://dx.doi.org/10.1093/bioinformatics/btw354</a>                               |
| DESeq2                | <a href="http://dx.doi.org/10.1186/s13059-014-0550-8">http://dx.doi.org/10.1186/s13059-014-0550-8</a>                                       |
| UpSetR                | <a href="http://dx.doi.org/10.1093/bioinformatics/btx364">http://dx.doi.org/10.1093/bioinformatics/btx364</a>                               |
| DeconRNASeq           | <a href="http://dx.doi.org/10.1093/bioinformatics/btt090">http://dx.doi.org/10.1093/bioinformatics/btt090</a>                               |
| Immune cell Reference | <a href="http://dx.doi.org/10.1038/srep40508">http://dx.doi.org/10.1038/srep40508</a>                                                       |

**Supplementary Table 1. Software packages used in RNA sequencing data analysis.**

| <b>Antibody</b>                    | <b>Dilution</b> | <b>Source</b> | <b>Code</b> |
|------------------------------------|-----------------|---------------|-------------|
| <b>Primary antibodies</b>          |                 |               |             |
| Rabbit anti-beta Tubulin           | 1:200           | Abcam         | ab6046      |
| Mouse anti- $\alpha$ SMA           | 1:100           | Abcam         | ab7817      |
| <b>Secondary antibodies</b>        |                 |               |             |
| Alexa Fluor donkey anti-mouse 555  | 1:1,000         | Invitrogen    | ab150106    |
| Alexa Fluor donkey anti-rabbit 488 | 1:1,000         | Invitrogen    | ab150073    |
| Hoechst-33342 nuclear stain        | 1:10,000        | Sigma         | 14533       |

**Supplementary Table 2. Antibodies used in immunohistochemistry experiments.**
